# Supplementary material
Source: publisher figshare collection journal article supplement (https://acs.figshare.com/ndownloader/files/10071540)
Supplement: Supplementary file 1 [file 10071540]

HEADER    square_linker1_R                                            
REMARK  99                                                                      
REMARK  99 MOE v2015.10 (Chemical Computing Group Inc.) Tue Aug 29 11:49:17 2017
LINK         C    X1     0                 N   <2>     0     1555   1555  1.46
LINK         C    X1     0                 C   <2>     0     1555   1555  1.40
LINK         C    X1     0                 C   <2>     0     1555   1555  1.40
HETATM    1  C1   X1     1       2.736  -8.543  10.706  1.00  0.00           C  
HETATM    2  C2   X1     1       2.031  -7.179  10.996  1.00  0.00           C  
HETATM    3  C3   X1     1       2.543  -5.975  10.136  1.00  0.00           C  
HETATM    4  C4   X1     1       1.088  -5.508   9.947  1.00  0.00           C  
HETATM    5  N    X1     1       1.920  -9.601  10.489  1.00  0.00           N  
HETATM    6  C8   X1     1       2.515 -10.912  10.177  1.00  0.00           C  
HETATM    7  O    X1     1       3.208 -12.337   8.355  1.00  0.00           O1-
HETATM    8  C19  X1     1       2.231 -11.340   8.707  1.00  0.00           C  
HETATM    9  N    X1     1       0.835 -11.823   8.522  1.00  0.00           N  
HETATM   10  C    X1     1       1.924 -11.885  11.243  1.00  0.00           C  
HETATM   11  C    X1     1       2.608 -11.826  12.637  1.00  0.00           C  
HETATM   12  C    X1     1       1.648 -12.334  13.750  1.00  0.00           C  
HETATM   13  O    X1     1       3.942  -8.716  10.656  1.00  0.00           O  
HETATM   14  C    X1     1       0.265 -13.030   9.034  1.00  0.00           C  
HETATM   15  C    X1     1      -0.860 -13.005   9.870  1.00  0.00           C  
HETATM   16  C    X1     1       0.646  -6.933  10.323  1.00  0.00           C  
HETATM   17  C    X1     1       2.085  -7.000  12.554  1.00  0.00           C  
HETATM   18  O    X1     1       1.259  -7.491  13.331  1.00  0.00           O  
HETATM   19  N    X1     1       3.152  -6.220  12.981  1.00  0.00           N  
HETATM   20  C2   X1     1       3.324  -5.854  14.377  1.00  0.00           C  
HETATM   21  C23  X1     1       4.579  -5.000  14.532  1.00  0.00           C  
HETATM   22  H32  X1     1       3.219  -5.280  10.641  1.00  0.00           H  
HETATM   23  H    X1     1       0.859 -11.675  11.389  1.00  0.00           H  
HETATM   24  H    X1     1       2.041 -12.924  10.922  1.00  0.00           H  
HETATM   25  H    X1     1       2.906 -10.799  12.880  1.00  0.00           H  
HETATM   26  H    X1     1       3.526 -12.427  12.614  1.00  0.00           H  
HETATM   27  H    X1     1       1.208 -13.289  13.442  1.00  0.00           H  
HETATM   28  H    X1     1       0.830 -11.619  13.888  1.00  0.00           H  
HETATM   29  H    X1     1       3.600 -10.874  10.335  1.00  0.00           H  
HETATM   30  H    X1     1      -1.319 -12.051  10.115  1.00  0.00           H  
HETATM   31  H    X1     1       0.212 -11.222   7.965  1.00  0.00           H  
HETATM   32  H    X1     1       3.019  -6.277   9.195  1.00  0.00           H  
HETATM   33  H    X1     1       0.859  -5.262   8.901  1.00  0.00           H  
HETATM   34  H    X1     1      -0.228  -7.023  10.985  1.00  0.00           H  
HETATM   35  H    X1     1       0.451  -7.563   9.444  1.00  0.00           H  
HETATM   36  H22  X1     1       2.431  -5.290  14.686  1.00  0.00           H  
HETATM   37  H21  X1     1       3.441  -6.740  15.002  1.00  0.00           H  
HETATM   38 H232  X1     1       4.482  -4.066  13.971  1.00  0.00           H  
HETATM   39 H233  X1     1       5.454  -5.549  14.147  1.00  0.00           H  
HETATM   40 H231  X1     1       4.767  -4.748  15.581  1.00  0.00           H  
HETATM   41  H    X1     1       0.744  -4.696  10.624  1.00  0.00           H  
HETATM   42  H    X1     1       0.927  -9.494  10.539  1.00  0.00           H  
HETATM   43  H    X1     1       3.822  -5.882  12.296  1.00  0.00           H  
HETATM   44  O   <2>     2       1.048 -11.244  16.125  1.00  0.00           O  
HETATM   45  C   <2>     2       1.993 -12.004  16.098  1.00  0.00           C  
HETATM   46  N   <2>     2       2.663 -12.246  17.211  1.00  0.00           N  
HETATM   47  N   <2>     2       2.380 -12.609  14.979  1.00  0.00           N  
HETATM   48  C   <2>     2       0.810 -14.279   8.707  1.00  0.00           C  
HETATM   49  C   <2>     2       0.301 -15.456   9.264  1.00  0.00           C  
HETATM   50  C   <2>     2      -0.789 -15.416  10.137  1.00  0.00           C  
HETATM   51  C   <2>     2      -1.319 -16.717  10.753  1.00  0.00           C  
HETATM   52  C   <2>     2      -1.373 -14.179  10.428  1.00  0.00           C  
HETATM   53  O   <2>     2      -0.346 -17.174  11.707  1.00  0.00           O  
HETATM   54  H   <2>     2       2.322 -11.771  18.015  1.00  0.00           H  
HETATM   55  H   <2>     2       1.664 -14.334   8.039  1.00  0.00           H  
HETATM   56  H   <2>     2       0.777 -16.403   9.024  1.00  0.00           H  
HETATM   57  H   <2>     2      -2.227 -14.117  11.098  1.00  0.00           H  
HETATM   58  H   <2>     2      -1.455 -17.478   9.978  1.00  0.00           H  
HETATM   59  H   <2>     2      -2.269 -16.551  11.270  1.00  0.00           H  
HETATM   60  H   <2>     2      -0.600 -17.991  12.125  1.00  0.00           H  
HETATM   61  H   <2>     2       3.452 -12.859  17.242  1.00  0.00           H  
HETATM   62  H   <2>     2       3.157 -13.239  14.981  1.00  0.00           H  
CONECT    1    2    5   13   13
CONECT    2    1    3   16   17
CONECT    3    2    4   22   32
CONECT    4    3   16   33   41
CONECT    5    1    6   42
CONECT    6    5    8   10   29
CONECT    7    8
CONECT    8    6    7    9
CONECT    9    8   14   31
CONECT   10    6   11   23   24
CONECT   11   10   12   25   26
CONECT   12   11   27   28   47
CONECT   13    1    1
CONECT   14    9   15   48   48
CONECT   15   14   30   52   52
CONECT   16    2    4   34   35
CONECT   17    2   18   18   19
CONECT   18   17   17
CONECT   19   17   20   43
CONECT   20   19   36   37   21
CONECT   21   20   38   39   40
CONECT   22    3
CONECT   23   10
CONECT   24   10
CONECT   25   11
CONECT   26   11
CONECT   27   12
CONECT   28   12
CONECT   29    6
CONECT   30   15
CONECT   31    9
CONECT   32    3
CONECT   33    4
CONECT   34   16
CONECT   35   16
CONECT   36   20
CONECT   37   20
CONECT   38   21
CONECT   39   21
CONECT   40   21
CONECT   41    4
CONECT   42    5
CONECT   43   19
CONECT   44   45   45
CONECT   45   44   44   46   47
CONECT   46   45   54   61
CONECT   47   12   45   62
CONECT   48   14   14   55   49
CONECT   49   48   56   50   50
CONECT   50   49   49   51   52
CONECT   51   50   58   59   53
CONECT   52   15   15   50   57
CONECT   53   51   60
CONECT   54   46
CONECT   55   48
CONECT   56   49
CONECT   57   52
CONECT   58   51
CONECT   59   51
CONECT   60   53
CONECT   61   46
CONECT   62   47
END
